# Supplementary material for: Interfacial co-polymerization derived nitrogen-doped carbon enables high-performance carbon felt for vanadium flow batteries
Source: Royal Society of Chemistry journal article supplement (doi:10.1039/d1ta03683a), 2021-01-01
Supplement: d1ta03683a1.pdf [file d1ta03683a1.pdf]

## Supplementary Materials

### Interfacial Co-polymerization Derived Nitrogen-doped Carbon Enables High-performance Carbon Felts for Vanadium Flow Batteries

Kaiyue Zhang<sup>a,b</sup>, Chuanwei Yan<sup>a</sup>, Ao Tang<sup>a,\*</sup>

<sup>a</sup> Institute of Metal Research, Chinese Academy of Sciences, Shenyang, China

<sup>b</sup> School of Materials Science and Engineering, University of Science and Technology of China, Shenyang, China

\*Corresponding author: Ao Tang

Email: a.tang@imr.ac.cn Tel: +86-024-81083919 Fax: +86-024-23998320

Table S1. Content of different nitrogen types on P-CF, DA-CF and PEI-DA-CF.

|           | pyridinic N<br>(at.%) | pyrrolic N<br>(at.%) | graphitic N<br>(at.%) |
|-----------|-----------------------|----------------------|-----------------------|
| P-CF      | 0.13                  | 0.07                 | 1.01                  |
| DA-CF     | 0.90                  | 0.56                 | 2.02                  |
| PEI-DA-CF | 1.71                  | 0.63                 | 2.64                  |

Table S2. Ohmic resistance ( $R_O$ ), charge transfer resistance ( $R_{CT}$ ) and diffusion resistance ( $R_D$ ) obtained by fitting Nyquist plots

|           | $R_O$ (m $\Omega$ ) | $R_{CT}$ (m $\Omega$ ) | $R_D$ (m $\Omega$ ) |
|-----------|---------------------|------------------------|---------------------|
| P-CF      | 71.81               | 117.4                  | 22.86               |
| DA-CF     | 71.38               | 77.75                  | 21.68               |
| PEI-DA-CF | 74.2                | 65.26                  | 12.8                |

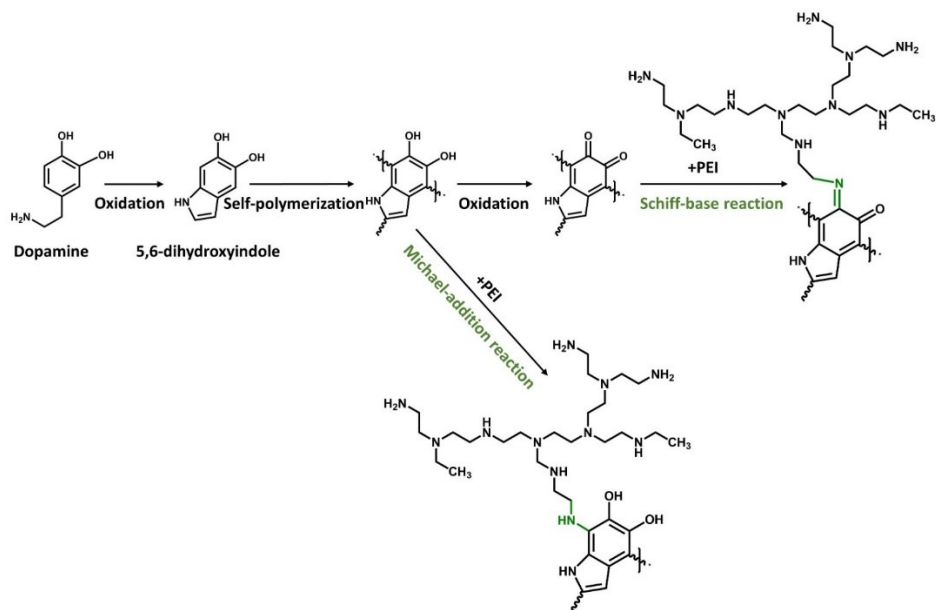

Figure S1. Proposed mechanism for the reactions between DA and PEI.

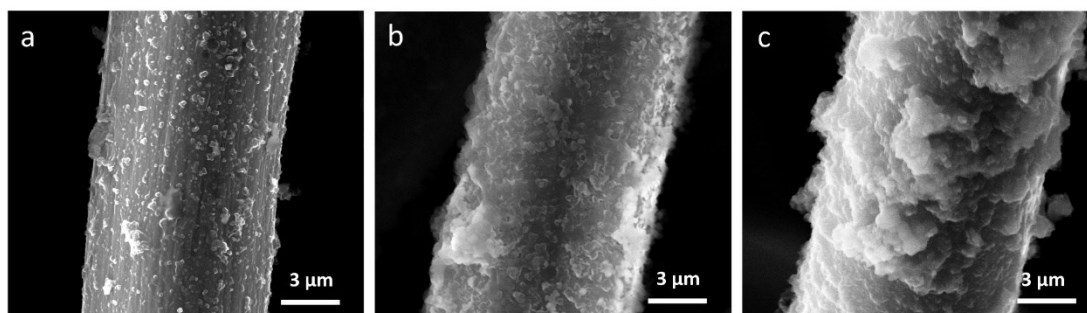

Figure S2. SEM images of Nitrogen-enriched precursor CFs with different copolymerization time: (a) 10 h; (b) 30 h and (c) 50 h.

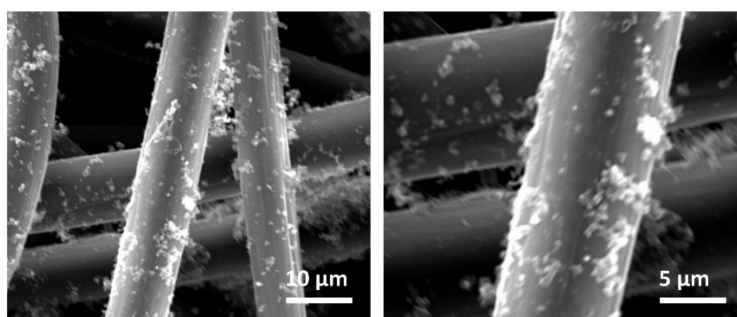

Figure S3. SEM images of Nitrogen-enriched precursor CF prepared via 30 h DA self-polymerization.

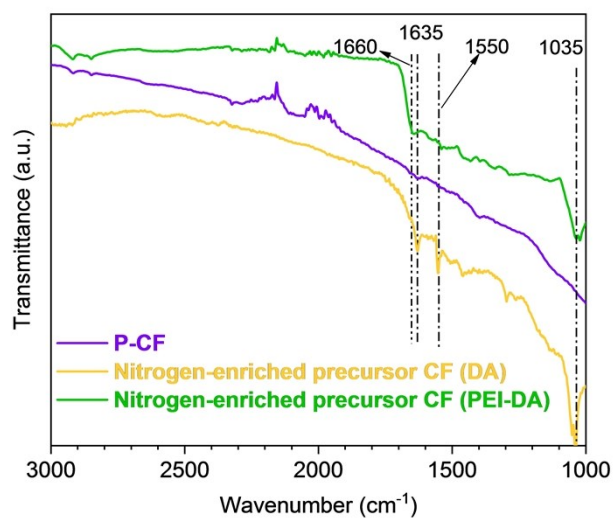

Figure S4. FT-IR spectra of P-CF and Nitrogen-enriched precursor CFs.

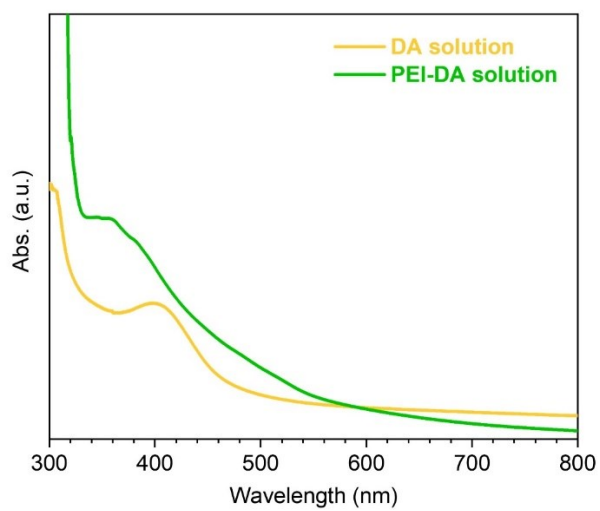

Figure S5. UV-Vis spectra of pure DA solution and PEI/DA solution.

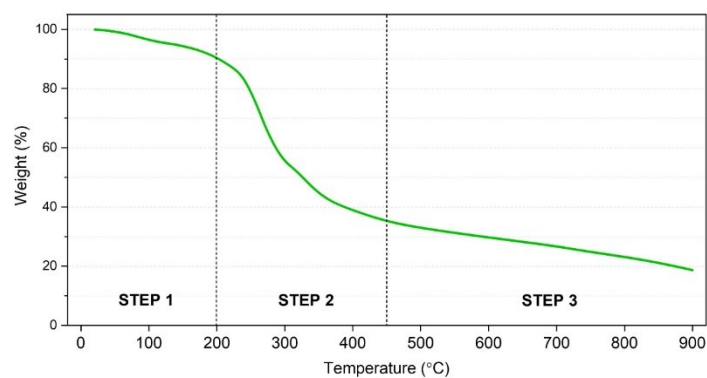

Figure S6. TGA curve of Nitrogen-enriched precursor layer.

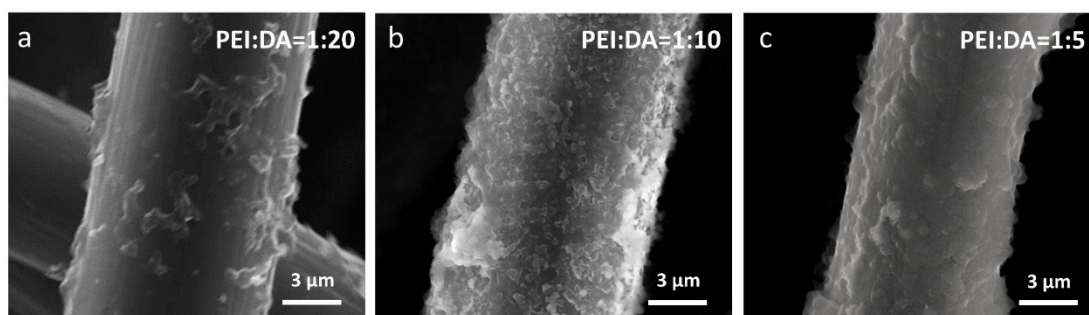

Figure S7. SEM images of Nitrogen-enriched precursor CFs with different mass ratios of PEI to DA: (a) 1:20; (b) 1:10 and (c) 1:5.

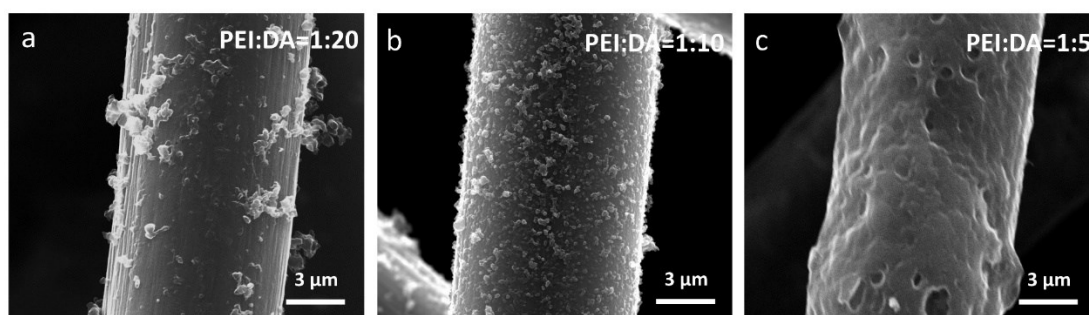

Figure S8. SEM images of PEI-DA-CF electrodes with different mass ratios of PEI to DA: (a) 1:20; (b) 1:10 and (c) 1:5.

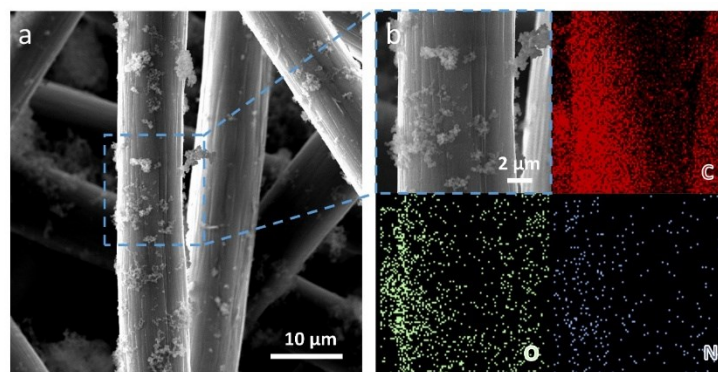

Figure S9. (a) SEM image of DA-CF and (b) corresponding EDX elemental mapping.

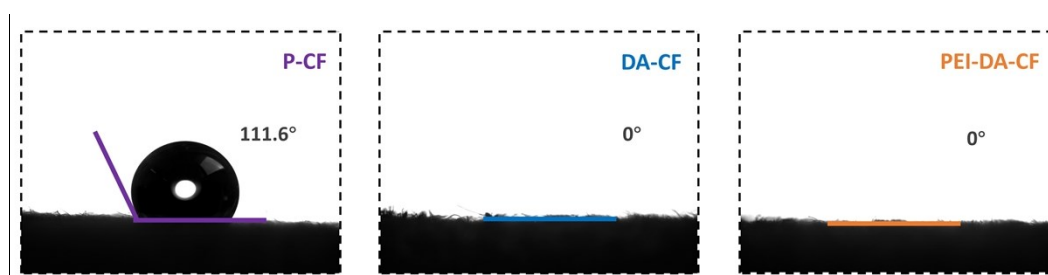

Figure S10. Contact angle measurements of P-CF, DA-CF and PEI-DA-CF.

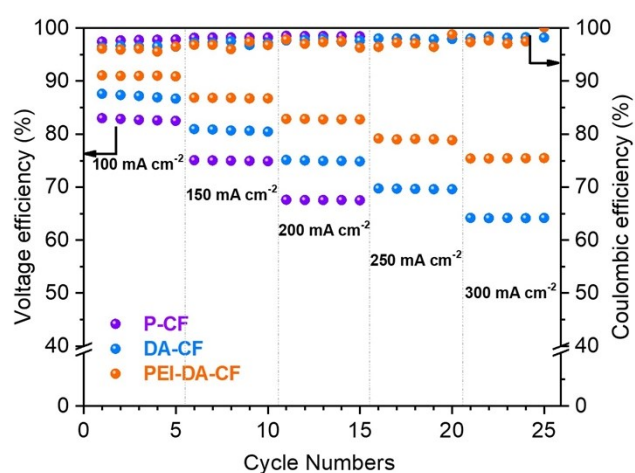

Figure S11. CE and VE of the VFBs at different current densities.

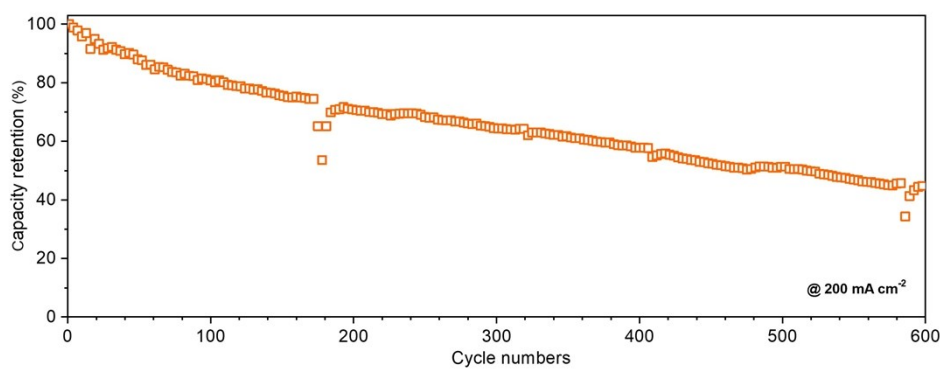

Figure S12. Capacity retention of the VFB with PEI-DA-CF electrodes at  $200 \text{ mA cm}^{-2}$ .

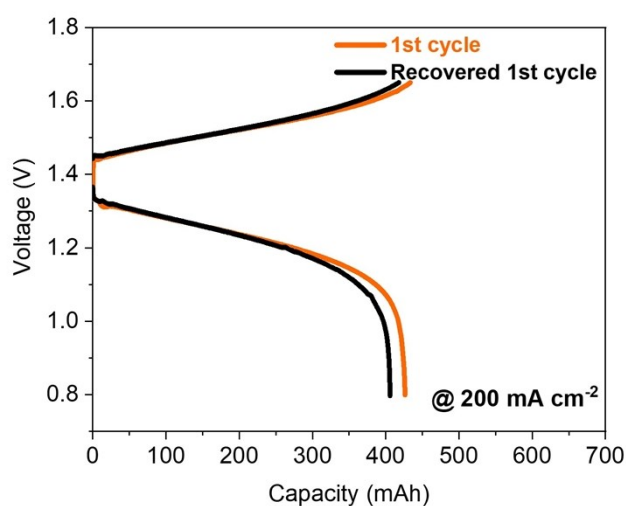

Figure S13. Comparison of charge-discharge curves for VFB with PEI-DA-CF electrodes before and after refreshing electrolytes and membrane at  $200 \text{ mA cm}^{-2}$ .

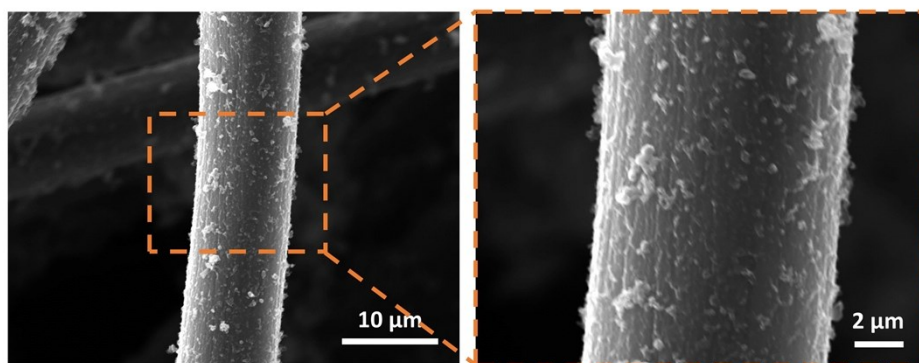

Figure S14. SEM images of PEI-DA-CF electrode after cycling at different magnifications.
